# Supplementary material for: Heterogeneity in Genetic Admixture across Different Regions of Argentina
Source: PLoS One. 2012 Apr 10;7(4):e34695. doi: 10.1371/journal.pone.0034695 (PMC3323559; doi:10.1371/journal.pone.0034695)
Supplement: Table S1 — Individual information on the number of grandparents born in Argentina (by region), other South American country or Europe. (XLS) [file pone.0034695.s004.xls]

## Sheet: Sheet1
ID	Region				Number of grandparents per region					No information
		European	South American	Area Metropolitana Buenos Aires	Argentina Center Region	NWA	NEA	Center-West	South
1	NEA	0	0	0	0	2	2	0	0	0
2	NEA	0	0	0	0	0	4	0	0	0
3	NEA	0	0	0	0	0	4	0	0	0
4	NEA	0	0	0	0	0	4	0	0	0
5	NEA	0	0	0	0	0	3	0	0	1
6	NEA	0	0	0	0	0	3	0	0	1
7	NEA	0	0	0	0	0	3	0	0	1
8	NEA	0	0	0	0	0	3	0	0	1
9	NEA	0	0	0	0	0	4	0	0	0
10	NEA	0	0	1	0	0	3	0	0	0
11	NEA	0	0	0	0	0	3	0	0	1
12	NEA	0	0	0	0	0	4	0	0	0
13	NEA	0	0	0	0	0	4	0	0	0
14	NEA	0	2	0	0	0	2	0	0	0
15	NEA	0	4	0	0	0	0	0	0	0
16	NEA	1	0	0	0	0	3	0	0	0
17	NEA	2	0	0	0	0	2	0	0	0
18	NEA	0	0	0	0	0	4	0	0	0
19	NEA	0	0	0	0	0	3	0	0	1
20	NEA	0	0	0	0	0	4	0	0	0
21	NEA	0	0	0	0	0	4	0	0	0
22	NEA	0	0	0	0	4	0	0	0	0
23	NEA	0	0	0	0	0	3	0	0	1
24	NEA	0	0	0	0	4	0	0	0	0
25	NEA	0	0	0	0	0	4	0	0	0
26	NEA	0	0	0	0	0	3	0	0	1
27	NEA	0	0	0	0	0	3	0	0	1
28	NEA	0	2	0	0	0	2	0	0	0
29	NEA	0	0	0	0	0	4	0	0	0
30	NEA	0	2	0	0	0	2	0	0	0
31	NEA	0	4	0	0	0	0	0	0	0
32	NEA	0	1	0	0	0	3	0	0	0
33	NEA	0	4	0	0	0	0	0	0	0
34	BA	0	0	4	0	0	0	0	0	0
35	BA	2	0	0	2	0	0	0	0	0
36	BA	0	0	0	0	2	0	0	0	2
37	BA	0	0	0	3	0	0	0	0	1
38	BA	0	0	2	2	0	0	0	0	0
39	BA	0	0	1	0	3	0	0	0	0
40	BA	4	0	0	0	0	0	0	0	0
41	BA	2	0	2	0	0	0	0	0	0
42	BA	0	0	4	0	0	0	0	0	0
43	BA	1	0	0	2	0	0	1	0	0
44	BA	0	0	4	0	0	0	0	0	0
45	BA	4	0	0	0	0	0	0	0	0
46	BA	1	0	3	0	0	0	0	0	0
47	BA	0	4	0	0	0	0	0	0	0
48	BA	0	4	0	0	0	0	0	0	0
49	BA	0	0	1	2	0	0	0	0	1
50	BA	2	0	0	1	0	1	0	0	0
51	BA	0	4	0	0	0	0	0	0	0
52	BA	1	0	3	0	0	0	0	0	0
53	BA	1	1	2	0	0	0	0	0	0
54	BA	2	0	2	0	0	0	0	0	0
55	BA	1	0	1	0	0	2	0	0	0
56	BA	4	0	0	0	0	0	0	0	0
57	BA	4	0	0	0	0	0	0	0	0
58	BA	2	0	2	0	0	0	0	0	0
59	BA	4	0	0	0	0	0	0	0	0
60	BA	0	1	0	1	2	0	0	0	0
61	BA	4	0	0	0	0	0	0	0	0
62	BA	1	0	2	0	0	0	0	0	1
63	BA	0	0	1	2	0	0	0	0	1
64	BA	3	0	1	0	0	0	0	0	0
65	BA	1	0	3	0	0	0	0	0	0
66	BA	1	0	3	0	0	0	0	0	0
67	BA	0	0	2	0	0	0	0	0	2
68	BA	0	0	2	1	1	0	0	0	0
69	BA	0	4	0	0	0	0	0	0	0
70	BA	0	0	3	1	0	0	0	0	0
71	BA	4	0	0	0	0	0	0	0	0
72	BA	2	0	1	0	0	0	0	0	1
73	BA	4	0	0	0	0	0	0	0	0
74	BA	0	0	3	1	0	0	0	0	0
75	BA	0	0	3	0	0	0	0	0	1
76	BA	0	2	2	0	0	0	0	0	0
77	BA	1	0	0	3	0	0	0	0	0
78	BA	0	0	4	0	0	0	0	0	0
79	BA	4	0	0	0	0	0	0	0	0
80	BA	1	0	3	0	0	0	0	0	0
81	BA	3	1	0	0	0	0	0	0	0
82	BA	3	0	0	1	0	0	0	0	0
83	BA	0	0	2	1	0	1	0	0	0
84	BA	4	0	0	0	0	0	0	0	0
85	BA	3	0	1	0	0	0	0	0	0
86	BA	4	0	0	0	0	0	0	0	0
87	BA	1	0	0	3	0	0	0	0	0
88	BA	0	4	0	0	0	0	0	0	0
89	BA	1	0	0	1	0	0	1	0	1
90	BA	1	0	3	0	0	0	0	0	0
91	BA	0	0	0	2	0	2	0	0	0
92	BA	0	0	4	0	0	0	0	0	0
93	BA	2	0	2	0	0	0	0	0	0
94	BA	0	2	0	0	1	0	0	0	1
95	BA	3	0	1	0	0	0	0	0	0
96	BA	2	0	0	0	2	0	0	0	0
97	BA	1	0	1	1	0	0	0	0	1
98	BA	0	0	3	1	0	0	0	0	0
99	BA	4	0	0	0	0	0	0	0	0
100	BA	1	0	3	0	0	0	0	0	0
101	BA	3	0	0	1	0	0	0	0	0
102	BA	1	0	0	3	0	0	0	0	0
103	BA	0	0	0	4	0	0	0	0	0
104	BA	0	2	0	0	0	0	0	0	0
105	BA	1	0	0	3	0	0	0	0	0
106	BA	0	0	0	0	0	4	0	0	0
107	BA	0	0	0	4	0	0	0	0	1
108	BA	0	4	0	0	0	0	0	0	0
109	BA	0	1	0	1	0	1	0	0	1
110	BA	1	0	0	0	3	0	0	0	0
111	BA	1	3	0	0	0	0	0	0	0
112	BA	4	0	0	0	0	0	0	0	0
113	BA	0	0	0	4	0	0	0	0	0
114	BA	0	0	0	0	0	0	0	4	0
115	BA	0	0	0	4	0	0	0	0	0
116	BA	0	4	0	0	0	0	0	0	0
117	BA	2	0	0	2	0	0	0	0	0
118	BA	0	0	0	2	0	0	0	2	0
119	BA	1	0	3	0	0	0	0	0	0
120	BA	4	0	0	0	0	0	0	0	0
121	BA	3	0	0	0	0	0	0	1	0
122	BA	2	0	0	2	0	0	0	0	0
123	BA	1	3	0	0	0	0	0	0	0
124	BA	0	0	0	1	0	0	0	0	3
125	BA	1	0	0	3	0	0	0	0	0
126	BA	0	0	0	3	0	0	1	0	0
127	BA	1	2	0	1	0	0	0	0	0
128	BA	1	0	0	3	0	0	0	0	0
129	BA	2	0	0	2	0	0	0	0	0
130	BA	2	0	0	2	0	0	0	0	0
131	BA	0	0	0	4	0	0	0	0	0
132	BA	0	0	0	0	0	0	0	0	0
133	BA	0	0	0	0	0	4	0	0	0
134	BA	2	0	0	2	0	0	0	0	0
135	BA	4	0	0	0	0	0	0	0	0
136	BA	0	2	0	2	0	0	0	0	0
137	BA	1	0	0	0	0	0	1	0	0
138	BA	0	0	0	4	0	0	0	0	0
139	BA	1	0	0	2	0	0	0	1	0
140	BA	2	0	0	2	0	0	0	0	0
141	BA	0	0	0	4	0	0	0	0	0
142	BA	1	0	0	3	0	0	0	0	0
143	BA	0	4	0	0	0	0	0	0	0
144	BA	2	0	0	2	0	0	0	0	0
145	BA	0	4	0	0	0	0	0	0	0
146	BA	0	2	0	0	0	0	2	0	0
147	BA	0	0	0	0	0	0	0	4	0
148	BA	1	0	0	3	0	0	0	0	0
149	BA	4	0	0	0	0	0	0	0	0
150	BA	0	0	3	0	0	0	0	0	1
151	BA	0	0	0	2	0	2	0	0	0
152	BA	1	0	0	3	0	0	0	0	0
153	BA	0	0	0	2	0	0	0	2	0
154	BA	4	0	0	0	0	0	0	0	0
155	BA	3	0	0	1	0	0	0	0	0
156	BA	0	0	0	1	0	0	0	0	3
157	BA	3	0	0	1	0	0	0	0	0
158	BA	0	0	0	4	0	0	0	0	0
159	BA	0	4	0	0	0	0	0	0	0
160	BA	0	0	0	4	0	0	0	0	0
161	BA	0	2	0	0	2	0	0	0	0
162	BA	3	0	0	1	0	0	0	0	0
163	BA	3	1	0	0	0	0	0	0	0
164	BA	0	0	0	4	0	0	0	0	0
165	BA	0	2	0	0	0	0	0	0	2
166	BA	4	0	0	0	0	0	0	0	0
167	BA	0	0	0	0	0	0	0	0	4
168	BA	0	0	0	2	0	2	0	0	0
169	BA	4	0	0	0	0	0	0	0	0
170	BA	0	0	0	2	0	0	0	2	0
171	BA	0	0	0	3	0	0	0	0	1
172	BA	0	0	0	0	4	0	0	0	0
173	BA	4	0	0	0	0	0	0	0	0
174	BA	0	0	0	2	0	0	0	0	2
175	BA	1	0	2	1	0	0	0	0	0
176	BA	2	0	0	2	0	0	0	0	0
177	BA	0	0	0	4	0	0	0	0	0
178	BA	2	0	0	2	0	0	0	0	0
179	BA	2	0	0	2	0	0	0	0	0
180	BA	0	0	2	0	0	0	0	0	2
181	BA	0	4	0	0	0	0	0	0	0
182	BA	1	3	0	0	0	0	0	0	0
183	BA	0	0	2	0	0	0	0	2	0
184	BA	0	0	0	4	0	0	0	0	0
185	BA	0	0	0	4	0	0	0	0	0
186	BA	0	0	0	4	0	0	0	0	0
187	BA	0	0	0	0	0	0	0	4	0
188	BA	1	0	0	3	0	0	0	0	0
189	BA	1	0	0	3	0	0	0	0	0
190	BA	0	0	2	0	0	0	1	0	1
191	BA	0	0	2	0	0	0	2	0	0
192	BA	0	0	0	0	0	0	3	0	1
193	BA	0	0	0	3	0	0	0	0	1
194	BA	1	0	0	2	0	1	0	0	0
195	BA	1	0	0	1	0	0	2	0	0
196	BA	0	0	0	4	0	0	0	0	0
197	BA	0	4	0	0	0	0	0	0	0
198	BA	2	0	0	2	0	0	0	0	0
199	BA	3	0	0	1	0	0	0	0	0
200	South	2	0	1	1	0	0	0	0	0
201	South	0	4	0	0	0	0	0	0	0
202	South	2	0	0	0	0	0	0	0	2
203	South	0	4	0	0	0	0	0	0	0
204	South	3	0	0	0	1	0	0	0	0
205	South	0	4	0	0	0	0	0	0	0
206	South	1	1	0	0	0	0	0	2	0
207	South	0	4	0	0	0	0	0	0	0
208	South	2	1	0	0	0	0	0	0	1
209	South	0	0	0	0	0	0	0	4	0
210	South	2	2	0	0	0	0	0	0	0
211	South	0	0	0	0	0	0	0	2	2
212	South	2	2	0	0	0	0	0	0	0
213	South	0	2	0	0	0	0	0	0	2
214	South	2	1	0	0	0	0	0	0	1
215	South	0	4	0	0	0	0	0	0	0
216	South	0	4	0	0	0	0	0	0	0
217	South	0	4	0	0	0	0	0	0	0
218	South	0	4	0	0	0	0	0	0	0
219	South	0	4	0	0	0	0	0	0	0
220	South	0	4	0	0	0	0	0	0	0
221	South	4	0	0	0	0	0	0	0	0
222	South	0	0	0	1	0	0	0	1	2
223	South	2	0	0	0	0	0	0	2	0
224	South	3	0	1	0	0	0	0	0	0
225	South	4	0	0	0	0	0	0	0	0
226	South	0	0	0	0	4	0	0	0	0
227	South	0	4	0	0	0	0	0	0	0
228	South	0	4	0	0	0	0	0	0	0
229	South	2	0	0	2	0	0	0	0	0
230	South	0	0	0	0	0	0	4	0	0
231	South	4	0	0	0	0	0	0	0	0
232	South	0	3	0	0	0	0	0	0	1
233	South	4	0	0	0	0	0	0	0	0
234	South	2	0	0	0	0	0	2	0	0
235	South	2	2	0	0	0	0	0	0	0
236	South	0	4	0	0	0	0	0	0	0
237	South	0	4	0	0	0	0	0	0	0
238	South	4	0	0	0	0	0	0	0	0
239	South	0	0	1	1	2	0	0	0	0
240	South	0	4	0	0	0	0	0	0	0
241	South	0	0	0	0	4	0	0	0	0
242	South	0	2	0	0	2	0	0	0	0
243	South	0	0	0	0	0	0	0	2	2
244	South	0	0	0	0	4	0	0	0	0
245	South	0	2	0	0	2	0	0	0	0
246	South	0	4	0	0	0	0	0	0	0
247	South	0	1	0	0	0	0	0	3	0
248	South	0	0	1	0	2	0	0	0	1
249	South	0	4	0	0	0	0	0	0	0
250	South	0	0	1	0	3	0	0	0	0
251	South	2	1	0	1	0	0	0	0	0
252	South	0	0	0	0	0	0	0	4	0
253	South	1	0	0	3	0	0	0	0	0
254	South	0	4	0	0	0	0	0	0	0
255	South	0	0	0	0	0	0	4	0	0
256	South	0	3	0	0	0	0	0	1	0
257	South	0	4	0	0	0	0	0	0	0
258	South	1	0	0	1	0	0	0	0	2
259	South	2	0	0	1	0	0	0	0	1
260	South	1	0	1	0	0	0	0	2	0
261	South	3	0	0	1	0	0	0	0	0
262	South	0	0	0	0	0	0	0	4	0
263	South	1	0	0	0	0	0	0	3	0
264	South	1	1	2	0	0	0	0	0	0
265	South	1	0	3	0	0	0	0	0	0
266	South	0	0	0	0	0	0	0	4	0
267	South	0	4	0	0	0	0	0	0	0
268	South	2	0	2	0	0	0	0	0	0
269	South	0	0	0	0	0	0	0	4	0
270	South	0	1	0	0	0	0	0	3	0
271	South	0	0	0	0	0	0	0	4	0
272	South	0	4	0	0	0	0	0	0	0
273	South	0	0	0	0	0	0	0	4	0
274	South	1	0	0	3	0	0	0	0	0
275	South	0	2	0	0	0	0	0	2	0
276	South	0	2	0	0	0	0	0	2	0
277	South	0	0	0	0	0	0	0	4	0
278	South	0	0	2	0	0	0	0	2	0
279	South	0	0	0	2	0	0	0	2	0
280	South	0	0	0	0	0	0	0	4	0
281	South	0	0	0	0	0	0	2	2	0
282	South	2	0	0	0	0	0	0	2	0
283	South	3	0	0	0	0	0	0	1	0
284	South	0	0	0	0	0	0	0	4	0
285	South	0	1	3	0	0	0	0	0	0
286	South	1	0	0	0	0	0	0	3	0
287	South	0	2	0	0	0	0	0	2	0
288	South	0	0	0	0	0	0	0	4	0
289	South	0	0	0	0	0	0	0	4	0
290	South	0	2	0	0	0	0	0	2	0
291	South	0	0	0	0	0	0	0	4	0
292	South	0	0	0	0	0	0	0	4	0
293	South	0	0	0	0	0	0	0	4	0
294	South	0	2	0	0	0	0	0	2	0
295	South	0	0	0	0	0	0	0	4	0
296	South	0	0	0	2	1	0	0	0	0
297	South	0	2	0	0	0	0	0	2	0
298	South	0	0	0	0	0	0	0	4	0
299	South	0	0	0	0	0	2	0	2	0
300	South	0	1	0	0	0	0	0	3	0
301	South	0	1	0	0	0	0	0	3	0
302	South	0	4	0	0	0	0	0	0	0
303	South	0	0	0	0	4	0	0	0	0
304	South	0	0	0	0	0	0	0	4	0
305	South	0	0	0	0	0	0	0	4	0
306	South	0	2	0	0	0	0	0	2	0
307	South	0	4	0	0	0	0	0	0	0
308	BA	1	0	1	0	0	0	0	0	0
309	BA	1	0	3	0	0	0	0	0	0
310	BA	0	1	3	0	0	0	0	0	0
311	BA	0	0	4	0	0	0	0	0	0
312	BA	0	0	0	4	0	0	0	0	0
313	BA	0	0	0	0	4	0	0	0	0
314	BA	1	0	3	0	0	0	0	0	0
315	BA	1	0	3	0	0	0	0	0	0
316	BA	3	0	0	0	0	0	0	1	0
317	BA	3	0	0	0	0	0	0	0	0
318	BA	4	0	0	0	0	0	0	0	0
319	BA	2	0	2	0	0	0	0	0	0
320	BA	0	0	4	0	0	0	0	0	0
321	BA	2	0	0	0	2	0	0	0	0
322	BA	0	0	0	4	0	0	0	0	0
323	BA	2	0	0	2	0	0	0	0	0
324	BA	0	0	0	4	0	0	0	0	0
325	BA	3	0	1	0	0	0	0	0	0
326	BA	0	0	0	0	2	0	0	0	0
327	BA	4	0	0	0	0	0	0	0	0
328	BA	0	0	0	0	4	0	0	0	0
329	BA	1	0	1	0	0	0	0	0	0
330	BA	0	0	0	2	0	0	2	0	0
331	BA	1	0	3	0	0	0	0	0	0
332	BA	2	0	0	2	0	0	0	0	0
333	BA	2	0	1	1	0	0	0	0	0
334	BA	4	0	0	0	0	0	0	0	0
335	BA	0	0	0	0	0	4	0	0	0
336	BA	0	0	0	2	0	0	0	0	0
337	BA	4	0	0	0	0	0	0	0	0
338	BA	0	0	0	4	0	0	0	0	0
339	BA	2	0	2	0	0	0	0	0	0
340	BA	0	0	0	0	2	0	2	0	0
341	BA	2	0	1	1	0	0	0	0	0
342	BA	1	0	3	0	0	0	0	0	0
343	BA	0	0	0	2	2	0	0	0	0
344	BA	2	0	2	0	0	0	0	0	0
345	BA	0	0	0	0	4	0	0	0	0
346	BA	1	0	3	0	0	0	0	0	0
347	BA	2	0	2	0	0	0	0	0	0
348	BA	0	0	0	0	0	0	4	0	0
349	BA	4	0	0	0	0	0	0	0	0
350	BA	0	0	0	4	0	0	0	0	0
351	BA	0	0	0	4	0	0	0	0	0
352	BA	0	0	0	0	4	0	0	0	0
353	BA	0	0	0	0	2	0	0	0	0
354	BA	0	0	4	0	0	0	0	0	0
355	BA	0	0	0	0	0	0	4	0	0
356	BA	0	0	3	1	0	0	0	0	0
357	BA	1	0	0	3	0	0	0	0	0
358	BA	4	0	0	0	0	0	0	0	0
359	BA	0	3	0	0	0	1	0	0	0
360	BA	1	0	0	3	0	0	0	0	0
361	BA	0	0	4	0	0	0	0	0	0
362	BA	0	0	2	0	0	0	0	0	0
363	BA	1	2	0	1	0	0	0	0	0
364	BA	0	4	0	0	0	0	0	0	0
365	BA	0	2	0	0	0	0	2	0	0
366	BA	3	0	0	0	1	0	0	0	0
367	BA	4	0	0	0	0	0	0	0	0
368	BA	0	4	0	0	0	0	0	0	0
369	BA	4	0	0	0	0	0	0	0	0
370	BA	4	0	0	0	0	0	0	0	0
371	BA	0	0	3	1	0	0	0	0	0
372	BA	0	3	0	0	0	1	0	0	0
373	BA	1	0	0	2	0	0	1	0	0
374	BA	0	0	0	0	0	0	4	0	0
375	BA	4	0	0	0	0	0	0	0	0
376	BA	0	0	4	0	0	0	0	0	0
377	BA	0	0	0	3	0	0	0	0	0
378	BA	0	0	0	0	4	0	0	0	0
379	BA	0	0	2	2	0	0	0	0	0
380	BA	3	0	1	0	0	0	0	0	0
381	BA	2	0	0	0	0	2	0	0	0
382	BA	4	0	0	0	0	0	0	0	0
383	BA	2	0	0	0	0	0	2	0	0
384	BA	4	0	0	0	0	0	0	0	0
385	BA	4	0	0	0	0	0	0	0	0
386	BA	0	4	0	0	0	0	0	0	0
387	BA	0	0	0	4	0	0	0	0	0
388	BA	0	4	0	0	0	0	0	0	0
389	BA	2	0	0	2	0	0	0	0	0
390	BA	0	0	4	0	0	0	0	0	0
391	BA	0	0	1	3	0	0	0	0	0
392	BA	0	4	0	0	0	0	0	0	0
393	BA	4	0	0	0	0	0	0	0	0
394	BA	0	0	0	0	0	0	4	0	0
395	BA	0	0	0	0	0	0	4	0	0
396	BA	2	2	0	0	0	0	0	0	0
397	BA	0	0	0	0	1	0	1	0	2
398	BA	0	0	0	2	0	2	0	0	0
399	BA	0	0	2	2	0	0	0	0	0
400	BA	3	0	0	0	1	0	0	0	0
401	BA	0	0	2	0	0	0	2	0	0
402	BA	0	3	0	0	0	0	0	0	1
403	BA	2	0	0	2	0	0	0	0	0
404	BA	4	0	0	0	0	0	0	0	0
405	NWA	0	1	0	0	2	0	0	0	1
406	NWA	0	0	0	0	4	0	0	0	0
407	NWA	0	0	0	4	0	0	0	0	0
408	NWA	0	0	0	0	4	0	0	0	0
409	NWA	0	0	0	0	2	0	0	0	2
410	NWA	1	2	0	0	1	0	0	0	0
411	NWA	0	0	0	0	4	0	0	0	0
412	NWA	0	0	0	0	3	0	0	0	1
413	NWA	0	0	0	0	4	0	0	0	0
414	NWA	0	4	0	0	0	0	0	0	0
415	NWA	0	1	0	0	3	0	0	0	0
416	NWA	0	0	0	0	4	0	0	0	0
417	NWA	0	0	0	0	3	0	0	0	1
418	NWA	0	0	0	0	4	0	0	0	0
419	NWA	0	0	0	0	3	0	0	0	1
420	NWA	0	0	0	0	4	0	0	0	0
421	NWA	0	0	0	0	4	0	0	0	0
422	NWA	0	0	0	0	3	0	0	0	1
423	NWA	0	4	0	0	0	0	0	0	0
424	NWA	0	0	0	0	4	0	0	0	0
425	NWA	0	0	0	0	3	0	0	0	1
426	NWA	0	0	0	0	3	0	0	0	1
427	NWA	0	0	0	0	3	0	0	0	1
428	NWA	2	0	0	0	2	0	0	0	0
429	NWA	0	2	0	0	2	0	0	0	0
430	NWA	0	0	0	0	3	0	0	0	1
431	NWA	0	4	0	0	0	0	0	0	0
432	NWA	0	0	0	0	3	0	0	0	1
433	NWA	0	2	0	0	2	0	0	0	0
434	NWA	0	0	0	0	4	0	0	0	0
435	NWA	0	2	0	0	2	0	0	0	0
436	NWA	0	0	0	0	3	0	0	0	1
437	NWA	0	0	0	0	2	0	0	0	2
438	NWA	1	0	0	0	3	0	0	0	0
439	NWA	0	0	0	0	4	0	0	0	0
440	NWA	0	1	0	0	2	1	0	0	0
441	NWA	0	0	0	0	4	0	0	0	0
